# Supplementary material
Source: PubMed Central journal article supplement (PMC4789914)
Supplement: huyk000030.ww1_default.pdf [file huyk000030.ww1_default.pdf]

**APPENDIX [posted as supplied by author]**

**Table A Dose conversion to chlorpromazine equivalencies (based on references<sup>1-3</sup>)**

| Antipsychotic Agent | Chlorpromazine (CPZ) equivalencies<br>(agent * <i>FACTOR</i> = 100 mg of CPZ) |
|---------------------|-------------------------------------------------------------------------------|
| Haloperidol         | 50                                                                            |
| Aripiprazole        | 13.3                                                                          |
| Olanzapine          | 20                                                                            |
| Quetiapine          | 1.3                                                                           |
| Risperidone         | 50                                                                            |
| Ziprasidone         | 1.7                                                                           |

**Table B Dose distribution**

| %ile        | Mg chlorpromazine equivalencies (mg actual dose) |          |            |          |            |          |             |          |                    |          |
|-------------|--------------------------------------------------|----------|------------|----------|------------|----------|-------------|----------|--------------------|----------|
|             | Haloperidol                                      |          | Olanzapine |          | Quetiapine |          | Risperidone |          | All antipsychotics |          |
| 10          | 25                                               | (0.5)    | 50         | (2.5)    | 33         | (25)     | 13          | (0.25)   | 14                 |          |
| 20          | 50                                               | (1.0)    | 50         | (2.5)    | 33         | (25)     | 13          | (0.25)   | 25                 |          |
| 30          | 50                                               | (1.0)    | 50         | (2.5)    | 33         | (25)     | 25          | (0.5)    | 33                 |          |
| 40          | 50                                               | (1.0)    | 50         | (2.5)    | 33         | (25)     | 25          | (0.5)    | 50                 |          |
| 50          | 100                                              | (2.0)    | 50         | (2.5)    | 52         | (40)     | 25          | (0.5)    | 50                 |          |
| 60          | 100                                              | (2.0)    | 100        | (5.0)    | 65         | (50)     | 25          | (0.5)    | 50                 |          |
| 70          | 150                                              | (3.0)    | 100        | (5.0)    | 65         | (50)     | 50          | (1.0)    | 65                 |          |
| 80          | 250                                              | (5.0)    | 100        | (5.0)    | 72         | (55)     | 50          | (1.0)    | 100                |          |
| 90          | 375                                              | (7.5)    | 100        | (5.0)    | 130        | (100)    | 50          | (1.0)    | 100                |          |
| Dose groups | Mg cpz                                           | % of pts | Mg cpz     | % of pts | Mg cpz     | % of pts | Mg cpz      | % of pts | Mg cpz             | % of pts |
| Low         | ]0,50]                                           | 41.4%    | ]0,50]     | 55.6%    | ]0,50[     | 49.6%    | ]0,25]      | 64.1%    | ]0,50[             | 39.9%    |
| Medium      | ]50,200]                                         | 36.9%    | ]50,100]   | 34.9%    | ]50,75]    | 30.7%    | ]25,50]     | 25.9%    | ]50,75]            | 35.9%    |
| High        | >200                                             | 21.7%    | >100       | 9.5%     | >75        | 19.6%    | >50         | 10.0%    | >75                | 24.2%    |

%-ile: Percentile; pts: patients

**Table C Additional characteristics for residents initiating antipsychotics during a nursing home stay**

|                                            | Haloperidol |         | Aripiprazole |         | Olanzapine |         | Quetiapine |         | Risperidone |         | Ziprasidone |         |
|--------------------------------------------|-------------|---------|--------------|---------|------------|---------|------------|---------|-------------|---------|-------------|---------|
|                                            | N or mean   | % or SD | N or mean    | % or SD | N or mean  | % or SD | N or mean  | % or SD | N or mean   | % or SD | N or mean   | % or SD |
| <b>Patient-level Characteristics</b>       |             |         |              |         |            |         |            |         |             |         |             |         |
| Residents                                  | 5,904       |         | 1,849        |         | 22,919     |         | 15,776     |         | 27,936      |         | 1,061       |         |
| Year of index date                         |             |         |              |         |            |         |            |         |             |         |             |         |
| 2001 <sup>(1)</sup>                        | 360         | 6.1%    | 0            | 0.0%    | 1,341      | 5.9%    | 340        | 2.2%    | 1,550       | 5.5%    | 11          | 1.0%    |
| 2002                                       | 1,085       | 18.4%   | 8            | 0.4%    | 5,467      | 23.9%   | 1,348      | 8.5%    | 5,472       | 19.6%   | 51          | 4.8%    |
| 2003                                       | 1,283       | 21.7%   | 271          | 14.7%   | 7,207      | 31.4%   | 3,253      | 20.6%   | 6,217       | 22.3%   | 214         | 20.2%   |
| 2004                                       | 1,410       | 23.9%   | 733          | 39.6%   | 5,410      | 23.6%   | 5,004      | 31.7%   | 7,512       | 26.9%   | 377         | 35.5%   |
| 2005                                       | 1,766       | 29.9%   | 837          | 45.3%   | 3,494      | 15.2%   | 5,831      | 37.0%   | 7,185       | 25.7%   | 408         | 38.5%   |
| Education                                  |             |         |              |         |            |         |            |         |             |         |             |         |
| less than high school                      | 2,609       | 44.2%   | 754          | 40.8%   | 9,249      | 40.4%   | 6,327      | 40.1%   | 11,855      | 42.4%   | 502         | 47.3%   |
| high school                                | 1,534       | 26.0%   | 556          | 30.1%   | 6,520      | 28.4%   | 4,670      | 29.6%   | 7,643       | 27.4%   | 282         | 26.6%   |
| greater than high school                   | 610         | 10.3%   | 238          | 12.9%   | 2,509      | 10.9%   | 1,927      | 12.2%   | 3,042       | 10.9%   | 99          | 9.3%    |
| missing                                    | 1,151       | 19.5%   | 301          | 16.3%   | 4,641      | 20.2%   | 2,852      | 18.1%   | 5,396       | 19.3%   | 178         | 16.8%   |
| <b>Other comorbidities</b>                 |             |         |              |         |            |         |            |         |             |         |             |         |
| Obesity                                    | 143         | 2.4%    | 70           | 3.8%    | 420        | 1.8%    | 339        | 2.1%    | 544         | 1.9%    | 35          | 3.3%    |
| Epilepsy                                   | 379         | 6.4%    | 142          | 7.7%    | 1,434      | 6.3%    | 1,073      | 6.8%    | 1,745       | 6.2%    | 83          | 7.8%    |
| <b>Facility-level Characteristics</b>      |             |         |              |         |            |         |            |         |             |         |             |         |
| Size                                       |             |         |              |         |            |         |            |         |             |         |             |         |
| small (<100 beds)                          | 2,131       | 36.1%   | 504          | 27.3%   | 6,905      | 30.1%   | 4,493      | 28.5%   | 8,571       | 30.7%   | 332         | 31.3%   |
| medium (100-200 beds)                      | 3,094       | 52.4%   | 1,034        | 55.9%   | 13,095     | 57.1%   | 9,069      | 57.5%   | 15,642      | 56.0%   | 625         | 58.9%   |
| large (>=200 beds)                         | 679         | 11.5%   | 311          | 16.8%   | 2,919      | 12.7%   | 2,214      | 14.0%   | 3,723       | 13.3%   | 104         | 9.8%    |
| Occupancy rate                             | 84.9%       | 13.9%   | 86.1%        | 13.4%   | 86.1%      | 13.5%   | 86.7%      | 13.1%   | 85.8%       | 13.9%   | 84.3%       | 14.1%   |
| Organizational structure                   |             |         |              |         |            |         |            |         |             |         |             |         |
| Hospital based                             | 318         | 5.4%    | 39           | 2.1%    | 914        | 4.0%    | 624        | 4.0%    | 1,292       | 4.6%    | 46          | 4.3%    |
| Part of multi-facility ownership structure | 3,288       | 55.7%   | 1,044        | 56.5%   | 13,330     | 58.2%   | 8,782      | 55.7%   | 15,539      | 55.6%   | 568         | 53.5%   |
| Ownership                                  |             |         |              |         |            |         |            |         |             |         |             |         |
| Government                                 | 333         | 5.6%    | 138          | 7.5%    | 1,259      | 5.5%    | 959        | 6.1%    | 1,751       | 6.3%    | 65          | 6.1%    |
| For profit                                 | 4,188       | 70.9%   | 1,328        | 71.8%   | 16,360     | 71.4%   | 10,965     | 69.5%   | 19,570      | 70.1%   | 786         | 74.1%   |
| Nonprofit ownership                        | 1,383       | 23.4%   | 383          | 20.7%   | 5,300      | 23.1%   | 3,852      | 24.4%   | 6,615       | 23.7%   | 210         | 19.8%   |

|                                              | Haloperidol |         | Aripiprazole |         | Olanzapine |         | Quetiapine |         | Risperidone |         | Ziprasidone |         |
|----------------------------------------------|-------------|---------|--------------|---------|------------|---------|------------|---------|-------------|---------|-------------|---------|
|                                              | N or mean   | % or SD | N or mean    | % or SD | N or mean  | % or SD | N or mean  | % or SD | N or mean   | % or SD | N or mean   | % or SD |
| Alzheimer's special care unit                | 1,213       | 20.5%   | 466          | 25.2%   | 5,638      | 24.6%   | 3,819      | 24.2%   | 6,439       | 23.0%   | 257         | 24.2%   |
| Non-Alzheimer's special care unit            | 347         | 5.9%    | 104          | 5.6%    | 1,259      | 5.5%    | 919        | 5.8%    | 1,571       | 5.6%    | 46          | 4.3%    |
| <b>Quality Indicators</b>                    |             |         |              |         |            |         |            |         |             |         |             |         |
| % residents bedfast                          | 4.9%        | 6.4%    | 4.5%         | 5.5%    | 4.5%       | 6.0%    | 4.6%       | 6.1%    | 4.6%        | 6.0%    | 5.9%        | 6.6%    |
| % residents chair fast                       | 57.3%       | 17.8%   | 58.3%        | 17.6%   | 57.2%      | 18.1%   | 57.6%      | 17.6%   | 57.2%       | 17.8%   | 55.9%       | 16.9%   |
| % residents with facility acquired bedsores  | 3.7%        | 3.6%    | 3.7%         | 3.5%    | 3.6%       | 3.5%    | 3.6%       | 3.1%    | 3.6%        | 3.4%    | 3.8%        | 3.3%    |
| % residents with restraints                  | 7.2%        | 8.0%    | 6.3%         | 7.1%    | 7.2%       | 7.9%    | 6.7%       | 7.4%    | 6.9%        | 7.6%    | 7.2%        | 8.4%    |
| % residents on psychoactive medicines        | 61.5%       | 13.8%   | 64.3%        | 12.6%   | 61.4%      | 14.1%   | 63.4%      | 13.1%   | 61.9%       | 13.6%   | 64.7%       | 12.8%   |
| Total number of deficiencies                 | 6.8         | 5.8     | 6.4          | 5.2     | 6.8        | 5.8     | 6.7        | 5.6     | 6.6         | 5.7     | 7.0         | 5.3     |
| <b>Staffing</b>                              |             |         |              |         |            |         |            |         |             |         |             |         |
| Team-based physician care                    | 1,441       | 24.4%   | 571          | 30.9%   | 6,544      | 28.6%   | 4,810      | 30.5%   | 7,578       | 27.1%   | 244         | 23.0%   |
| No staff physicians available <sup>(2)</sup> | 1,005       | 17.0%   | 257          | 13.9%   | 3,413      | 14.9%   | 2,187      | 13.9%   | 4,418       | 15.8%   | 206         | 19.4%   |
| Mental health staffing available             | 2,847       | 48.2%   | 1,078        | 58.3%   | 12,255     | 53.5%   | 8,984      | 56.9%   | 14,583      | 52.2%   | 436         | 41.1%   |
| <b>Residents</b>                             |             |         |              |         |            |         |            |         |             |         |             |         |
| % residents with dementia                    | 45.7%       | 17.0%   | 47.6%        | 16.8%   | 46.6%      | 17.2%   | 47.5%      | 17.0%   | 46.8%       | 16.9%   | 46.8%       | 16.6%   |
| % residents with psychiatric diagnosis       | 18.6%       | 14.3%   | 21.6%        | 15.3%   | 18.1%      | 13.7%   | 19.2%      | 14.4%   | 18.6%       | 14.0%   | 21.2%       | 14.8%   |
| % residents with depression                  | 46.2%       | 21.0%   | 47.8%        | 21.1%   | 45.0%      | 20.5%   | 47.1%      | 20.6%   | 45.5%       | 20.8%   | 48.4%       | 21.5%   |
| % residents on Medicaid                      | 68.2%       | 17.0%   | 68.9%        | 15.8%   | 68.0%      | 16.2%   | 67.5%      | 16.2%   | 68.0%       | 16.4%   | 70.0%       | 15.5%   |
| % residents on Medicare                      | 11.2%       | 11.3%   | 11.8%        | 9.5%    | 11.5%      | 10.6%   | 12.0%      | 10.4%   | 11.7%       | 11.0%   | 11.0%       | 9.6%    |
| % private pay/private insurance residents    | 20.6%       | 14.2%   | 19.3%        | 13.4%   | 20.5%      | 13.7%   | 20.5%      | 13.7%   | 20.4%       | 13.7%   | 19.0%       | 13.0%   |

<sup>(1)</sup> Fewer residents entered the cohort in 2001 because the first six months were used to define the baseline covariates. The first possible cohort entry date was therefore July 1<sup>st</sup>, 2001.

<sup>(2)</sup> No physician on staff who supervises the care of residents when the attending physician is unavailable.

**Table D PS-adjusted stratified analyses of death within 180 Days**

|                                | Haloperidol |                | Aripiprazole |                | Olanzapine |                | Quetiapine |                | Ziprasidone |                |
|--------------------------------|-------------|----------------|--------------|----------------|------------|----------------|------------|----------------|-------------|----------------|
|                                | HR          | 95%CI          | HR           | 95%CI          | HR         | 95%CI          | HR         | 95%CI          | HR          | 95%CI          |
| <b>DEMENTIA</b>                |             |                |              |                |            |                |            |                |             |                |
| Non-cancer mortality           | 2.10        | (1.89 to 2.35) | 0.95         | (0.77 to 1.18) | 1.02       | (0.95 to 1.10) | 0.86       | (0.78 to 0.93) | 0.91        | (0.68 to 1.22) |
| Cause-specific mortality       | 1.80        | (1.53 to 2.12) | 0.94         | (0.68 to 1.28) | 1.00       | (0.90 to 1.11) | 0.88       | (0.78 to 0.99) | 0.85        | (0.55 to 1.30) |
| Circulatory system             | 2.25        | (1.64 to 3.10) | 0.46         | (0.19 to 1.13) | 0.97       | (0.77 to 1.21) | 0.73       | (0.55 to 0.96) | 0.57        | (0.18 to 1.80) |
| Cerebrovascular diseases       | 2.73        | (2.06 to 3.62) | 1.41         | (0.85 to 2.34) | 1.09       | (0.90 to 1.32) | 0.81       | (0.64 to 1.03) | 1.15        | (0.56 to 2.36) |
| Respiratory system             | 2.31        | (1.94 to 2.74) | 0.82         | (0.57 to 1.19) | 1.03       | (0.91 to 1.16) | 0.84       | (0.73 to 0.97) | 0.91        | (0.56 to 1.47) |
| Other                          | 2.10        | (1.89 to 2.35) | 0.95         | (0.77 to 1.18) | 1.02       | (0.95 to 1.10) | 0.86       | (0.78 to 0.93) | 0.91        | (0.68 to 1.22) |
| <b>No DEMENTIA</b>             |             |                |              |                |            |                |            |                |             |                |
| Non-cancer mortality           | 1.99        | (1.69 to 2.34) | 0.72         | (0.49 to 1.05) | 0.99       | (0.89 to 1.11) | 0.70       | (0.61 to 0.82) | 0.93        | (0.60 to 1.46) |
| Cause-specific mortality       | 1.96        | (1.57 to 2.45) | 0.63         | (0.36 to 1.10) | 1.01       | (0.86 to 1.17) | 0.63       | (0.51 to 0.78) | 0.98        | (0.53 to 1.79) |
| Circulatory system             | 2.17        | (1.33 to 3.53) |              |                | 0.66       | (0.45 to 0.97) | 0.52       | (0.31 to 0.86) | 2.01        | (0.80 to 5.06) |
| Cerebrovascular diseases       | 2.25        | (1.53 to 3.31) | 1.06         | (0.49 to 2.29) | 0.95       | (0.72 to 1.25) | 0.65       | (0.46 to 0.94) | 1.19        | (0.43 to 3.25) |
| Respiratory system             | 1.89        | (1.38 to 2.59) | 0.67         | (0.33 to 1.37) | 0.99       | (0.80 to 1.22) | 0.86       | (0.67 to 1.10) | 0.73        | (0.30 to 1.80) |
| Other                          | 1.99        | (1.69 to 2.34) | 0.72         | (0.49 to 1.05) | 0.99       | (0.89 to 1.11) | 0.70       | (0.61 to 0.82) | 0.93        | (0.60 to 1.46) |
| <b>BEHAVIORAL DISTURBANCES</b> |             |                |              |                |            |                |            |                |             |                |
| Non-cancer mortality           | 1.97        | (1.65 to 2.35) | 1.11         | (0.82 to 1.52) | 1.05       | (0.95 to 1.18) | 0.89       | (0.78 to 1.02) | 1.18        | (0.80 to 1.74) |
| Cause-specific mortality       | 1.77        | (1.36 to 2.29) | 1.05         | (0.65 to 1.67) | 1.07       | (0.91 to 1.25) | 0.86       | (0.72 to 1.04) | 1.14        | (0.65 to 2.00) |
| Circulatory system             | 2.00        | (1.13 to 3.53) | 0.49         | (0.12 to 2.03) | 1.19       | (0.83 to 1.70) | 0.86       | (0.57 to 1.30) | 1.34        | (0.41 to 4.30) |
| Cerebrovascular diseases       | 2.71        | (1.74 to 4.23) | 1.69         | (0.80 to 3.57) | 1.04       | (0.76 to 1.44) | 0.93       | (0.65 to 1.33) | 1.28        | (0.46 to 3.67) |

|                                   |      |                |      |                |      |                        |      |                |      |                        |
|-----------------------------------|------|----------------|------|----------------|------|------------------------|------|----------------|------|------------------------|
| Respiratory system                | 1.99 | (1.50 to 2.65) | 1.02 | (0.62 to 1.68) | 1.05 | 1.41<br>(0.88 to 1.25) | 0.92 | (0.75 to 1.13) | 1.20 | 3.54<br>(0.63 to 2.27) |
| Other                             | 1.97 | (1.65 to 2.35) | 1.11 | (0.82 to 1.52) | 1.05 | (0.95 to 1.18)         | 0.89 | (0.78 to 1.02) | 1.18 | (0.80 to 1.74)         |
| <b>No Behavioral Disturbances</b> |      |                |      |                |      |                        |      |                |      |                        |
| Cause-specific mortality          | 2.11 | (1.89 to 2.34) | 0.79 | (0.62 to 1.00) | 1.00 | (0.93 to 1.08)         | 0.78 | (0.71 to 0.85) | 0.80 | (0.58 to 1.10)         |
| Circulatory system                | 1.89 | (1.62 to 2.20) | 0.77 | (0.55 to 1.07) | 0.98 | (0.88 to 1.09)         | 0.78 | (0.69 to 0.89) | 0.77 | (0.49 to 1.21)         |
| Cerebrovascular diseases          | 2.29 | (1.69 to 3.10) | 0.28 | (0.09 to 0.87) | 0.78 | (0.62 to 0.98)         | 0.60 | (0.45 to 0.81) | 0.90 | (0.36 to 2.20)         |
| Respiratory system                | 2.48 | (1.90 to 3.24) | 1.16 | (0.69 to 1.94) | 1.05 | (0.87 to 1.27)         | 0.70 | (0.55 to 0.89) | 1.16 | (0.57 to 2.37)         |
| Other                             | 2.29 | (1.91 to 2.74) | 0.66 | (0.42 to 1.02) | 1.01 | (0.89 to 1.14)         | 0.81 | (0.70 to 0.94) | 0.70 | (0.39 to 1.24)         |

**Figure A Haloperidol - Sensitivity analysis of residual confounding (Rule-out approach):**  
 Example for estimated RR=1.81 and different levels of confounder prevalence  
 (○  $P_c=0.05$ ; ■  $P_c=0.10$ ; ●  $P_c=0.25$ )

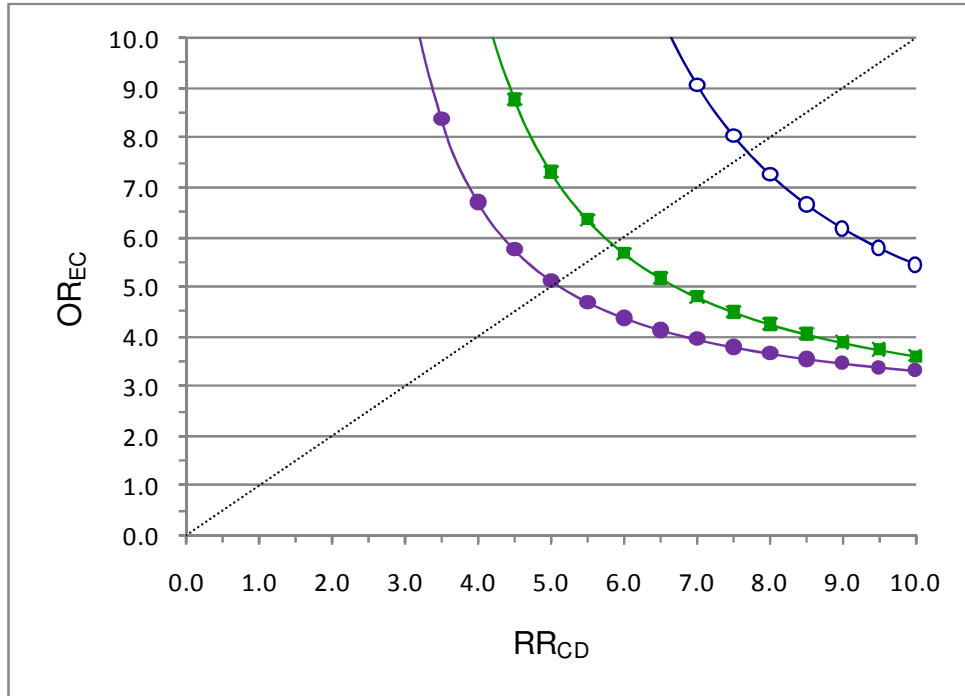

The selected RR (hdPS-adjusted HR) represents the most conservative estimate. Each line splits the area into two. The upper right area represents all combinations of OR<sub>EC</sub> and RR<sub>CD</sub> that would create confounding by an unmeasured factor strong enough to move the point estimate of RR to the null (RR=1) or beyond. The area to the lower left represents all parameter combinations that would not be able to move the estimated RR to the null.

**Figure B**      **Quetiapine - Sensitivity analysis of residual confounding (Rule-out approach):**  
 Example for estimated RR=0.83 and different levels of confounder prevalence  
 (○  $P_c=0.05$ ; ■  $P_c=0.10$ ; ●  $P_c=0.25$ )

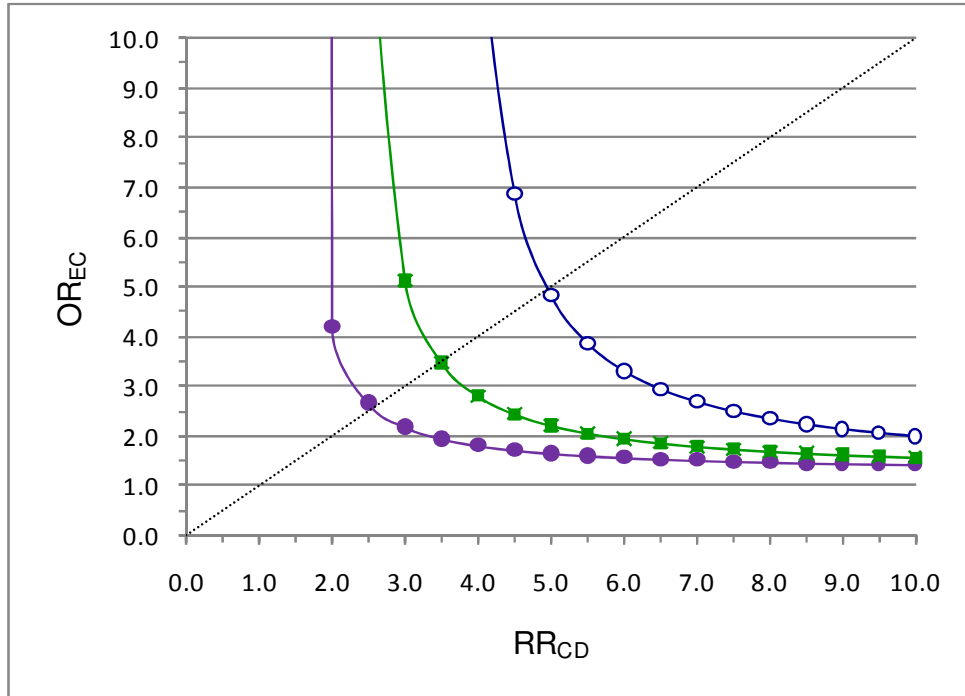

The selected RR (hdPS-adjusted HR) represents the most conservative estimate. Each line splits the area into two. The upper right area represents all combinations of  $OR_{EC}$  and  $RR_{CD}$  that would create confounding by an unmeasured factor strong enough to move the point estimate of RR to the null ( $RR=1$ ) or beyond. The area to the lower left represents all parameter combinations that would not be able to move the estimated RR to the null.

## REFERENCES

1. Atkins M, Burgess A, Bottomley C, Riccio M. Chlorpromazine equivalents: a consensus of opinion for both clinical and research applications. *Psychiatric Bulletin*. 1997;21:224-226.
2. Lehman A, Steinwachs D. Translating research into practice: the Schizophrenia Patient Outcomes Research Team (PORT) treatment recommendations. *Schizophrenia Bulletin*. 1998;24(1):1-10.
3. Woods S. Chlorpromazine equivalent doses for the newer atypical antipsychotics. *Journal of Clinical Psychiatry*. 2003;64(6):663-667.
